# Supplementary material for: Reversibility of imido-based ionic liquids: a theoretical and experimental study
Source: Royal Society of Chemistry journal article supplement (doi:10.1039/c7ra00008a), 2017-01-01
Supplement: c7ra00008a1.pdf [file c7ra00008a1.pdf]

## SUPPORTING INFORMATION

### **Reversibility of imido-based ionic liquids: a theoretical and experimental study**

*Bobo Cao<sup>1</sup>, Jiuyao Du<sup>1</sup>, Ziping Cao<sup>1</sup>, Haitao Sun<sup>1,\*</sup>, Xuejun Sun<sup>1,\*</sup>, Hui Fu<sup>2,\*</sup>*

<sup>1</sup>Chemistry and Chemical Engineering College, Qufu Normal University, Shandong, Qufu 273165,  
P. R. China

<sup>2</sup>State Key laboratory of Heavy Oil Processing, College of Science, China University of Petroleum,  
Shandong, Qingdao 266580, P. R. China

**Table S1** The averages of ESP calculated on the surface corresponding to individual atoms and the minimal/maximal value calculated on the whole molecular surfaces (in kcal/mol).

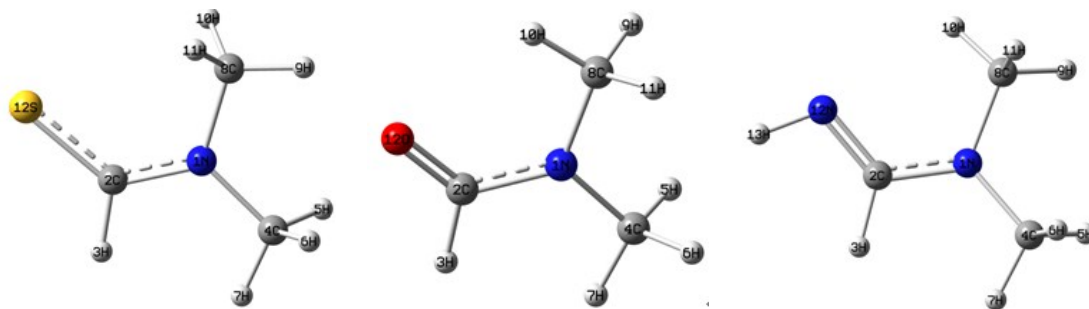

|               |        |               |        |               |        |
|---------------|--------|---------------|--------|---------------|--------|
| Minimal value | -35.04 | Minimal value | -43.69 | Minimal value | -43.71 |
| Maximal value | 26.57  | Maximal value | 22.17  | Maximal value | 21.75  |
| N1            | 3.49   | N1            | -1.17  | N1            | -13.98 |
| C2            | -7.48  | C2            | -2.80  | C2            | -9.61  |
| H3            | 4.19   | H3            | 6.44   | H3            | 10.25  |
| H5            | 19.79  | H5            | 14.28  | H5            | 9.44   |
| H6            | 19.80  | H6            | 14.30  | H6            | 8.94   |
| H7            | 21.32  | H7            | 16.82  | H7            | 12.63  |
| H9            | 18.66  | H9            | 9.86   | H9            | 5.76   |
| H10           | 2.15   | H10           | -2.97  | H10           | -9.88  |
| H11           | 2.12   | H11           | 9.86   | H11           | -0.50  |
| S12           | -26.37 | O12           | -33.06 | N12           | -32.54 |
|               |        |               |        | H13           | -0.27  |

Note: the atoms have zero surface area are not shown in the table.

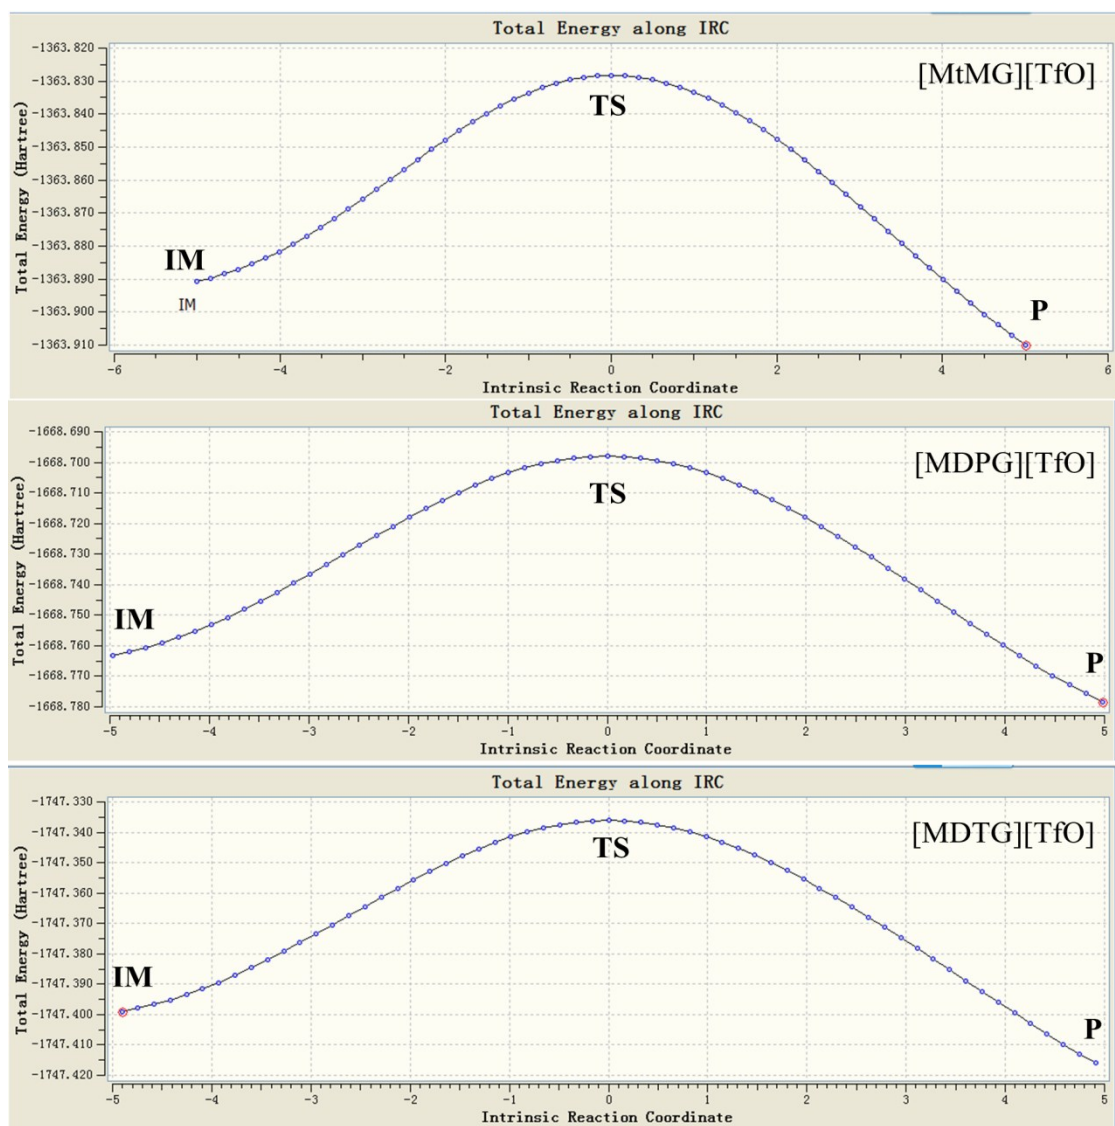

**Fig. S1** Total energy along IRC of [MtMG][TfO], [MDPG][TfO], [MDTG][TfO].

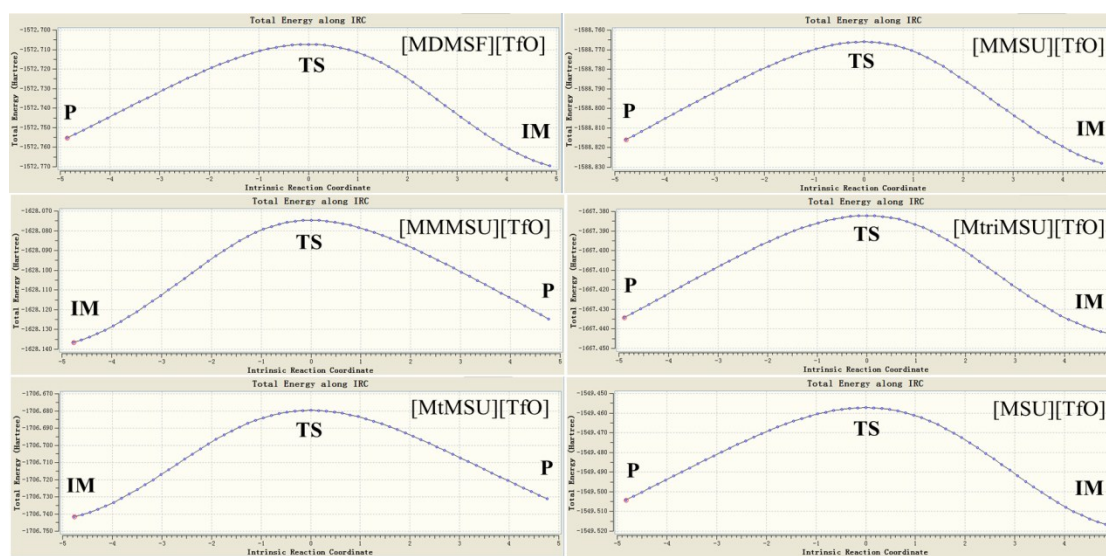

**Fig. S2** Total energy along IRC of [MDMSF][TfO], [MMSU][TfO], [MMMSU][TfO], [MtriMSU][TfO], [MtMSU][TfO], [MSU][TfO].

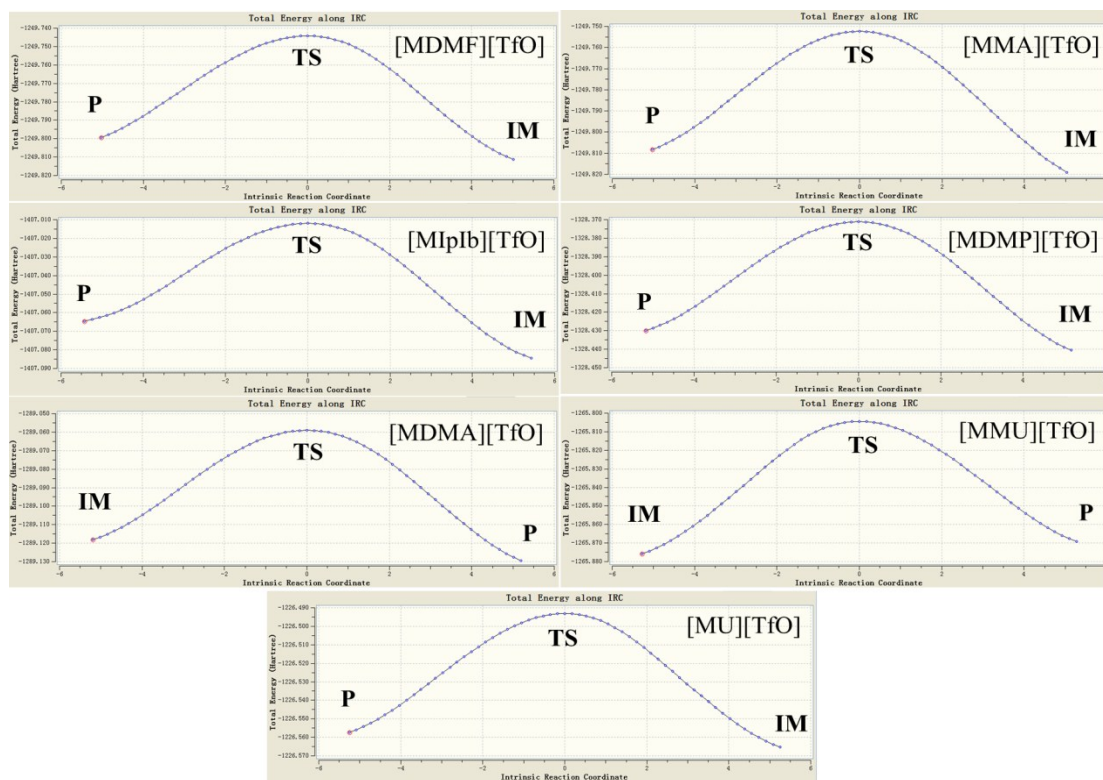

**Fig. S3** Total energy along IRC of [MDMF][TfO], [MMA][TfO], [MIPb][TfO], [MDMP][TfO], [MDMA][TfO], [MMU][TfO], [MU][TfO].

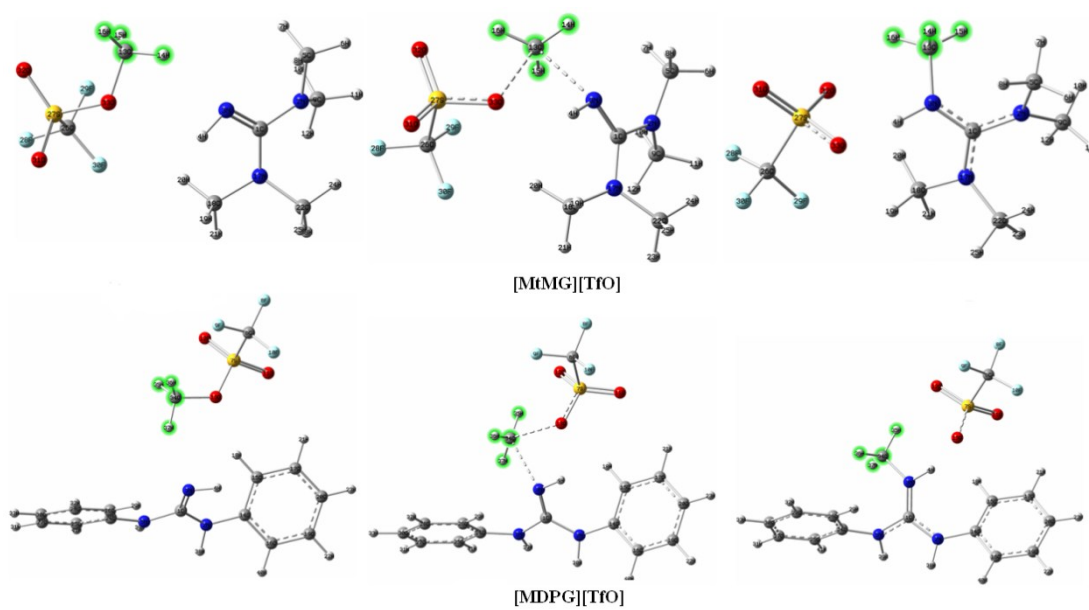

**Fig. S4** The most stable structures of [MtMG][TfO] and [MDPG][TfO].

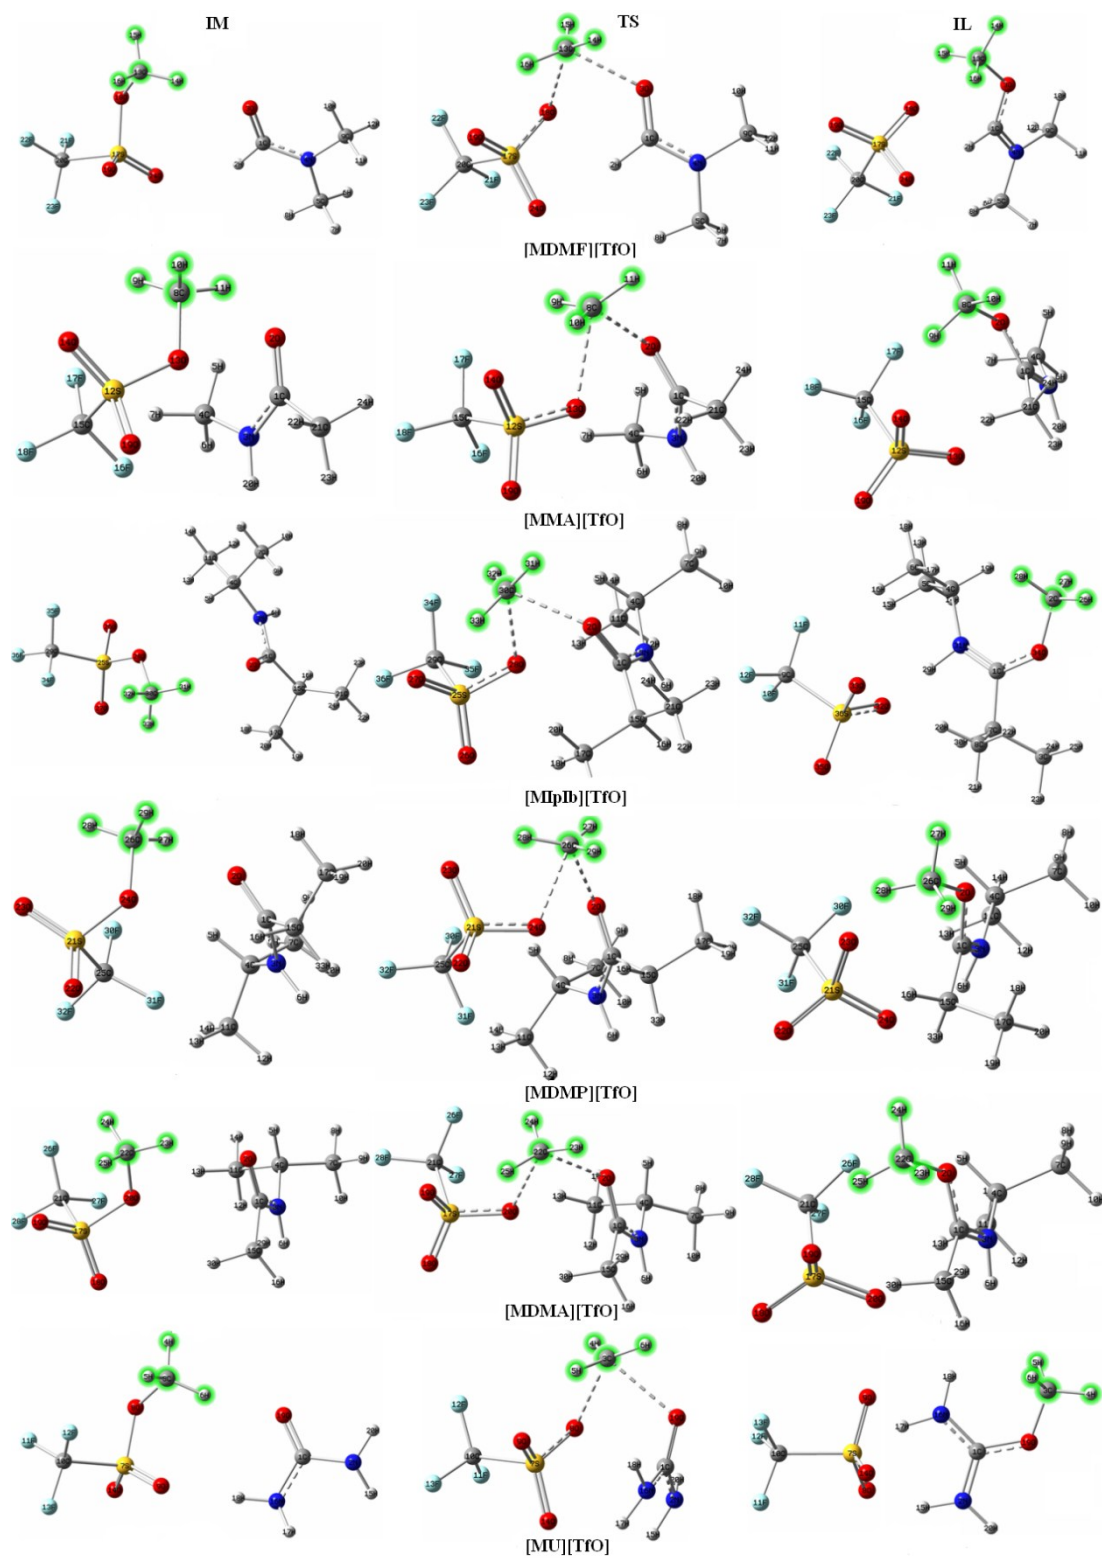

**Fig. S5** The most stable structures of [MDMF][TfO], [MMA][TfO], [MIPb][TfO], [MDMP][TfO], [MDMA][TfO] and [MU][TfO].

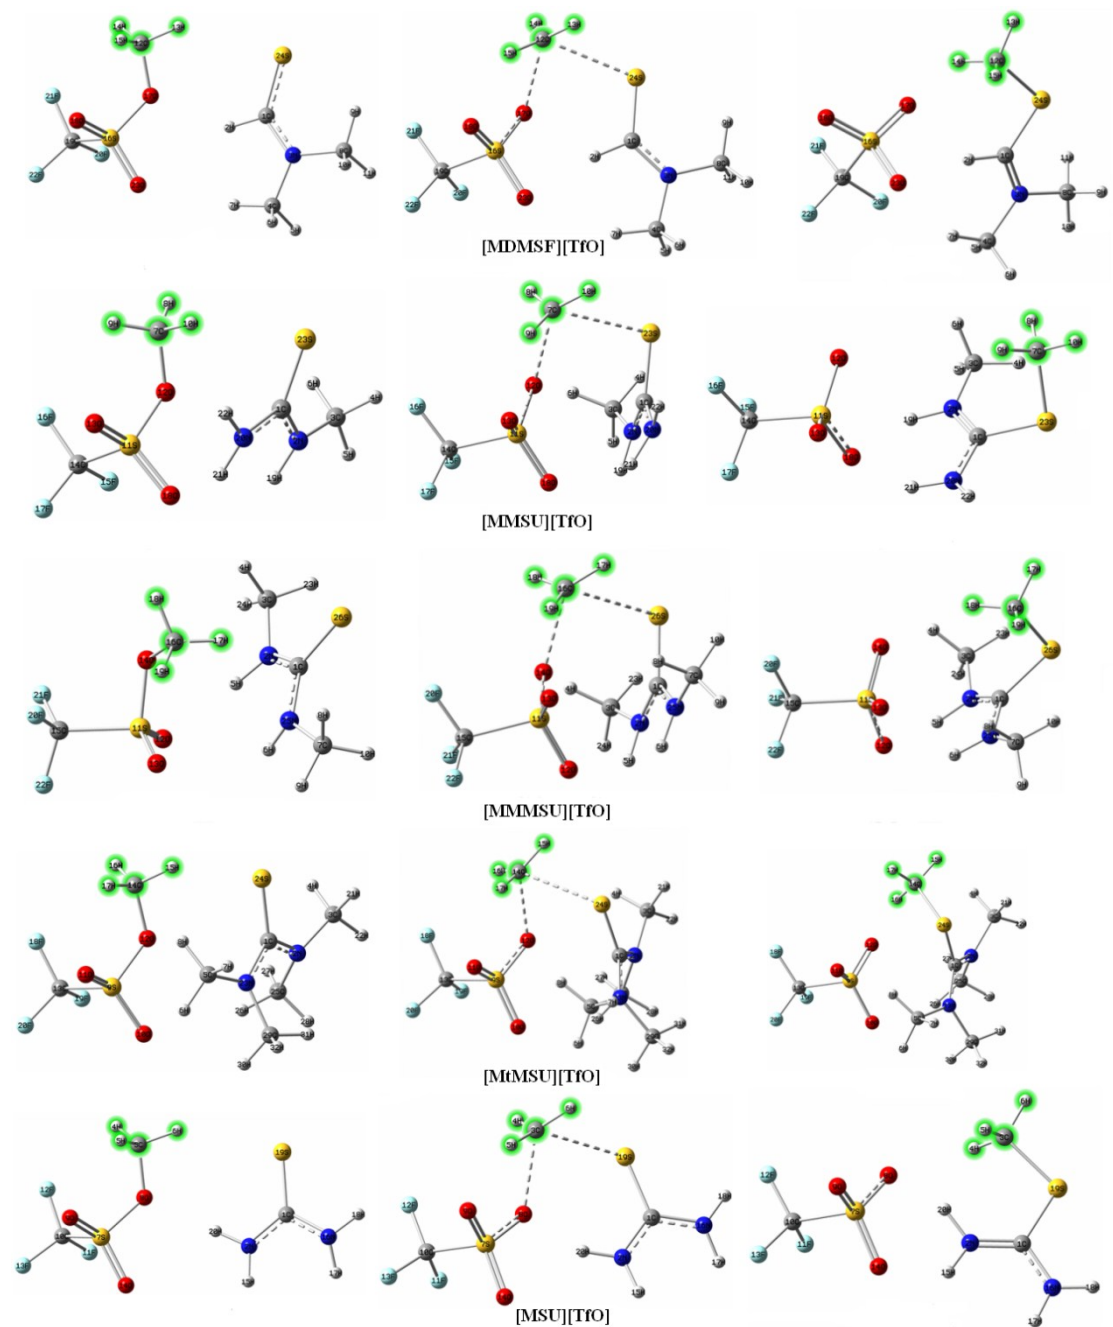

**Fig. S6** The most stable structures of [MDMSF][TfO], [MMMSU][TfO], [MMSU][TfO], [MtMSU][TfO] and [MSU][TfO].



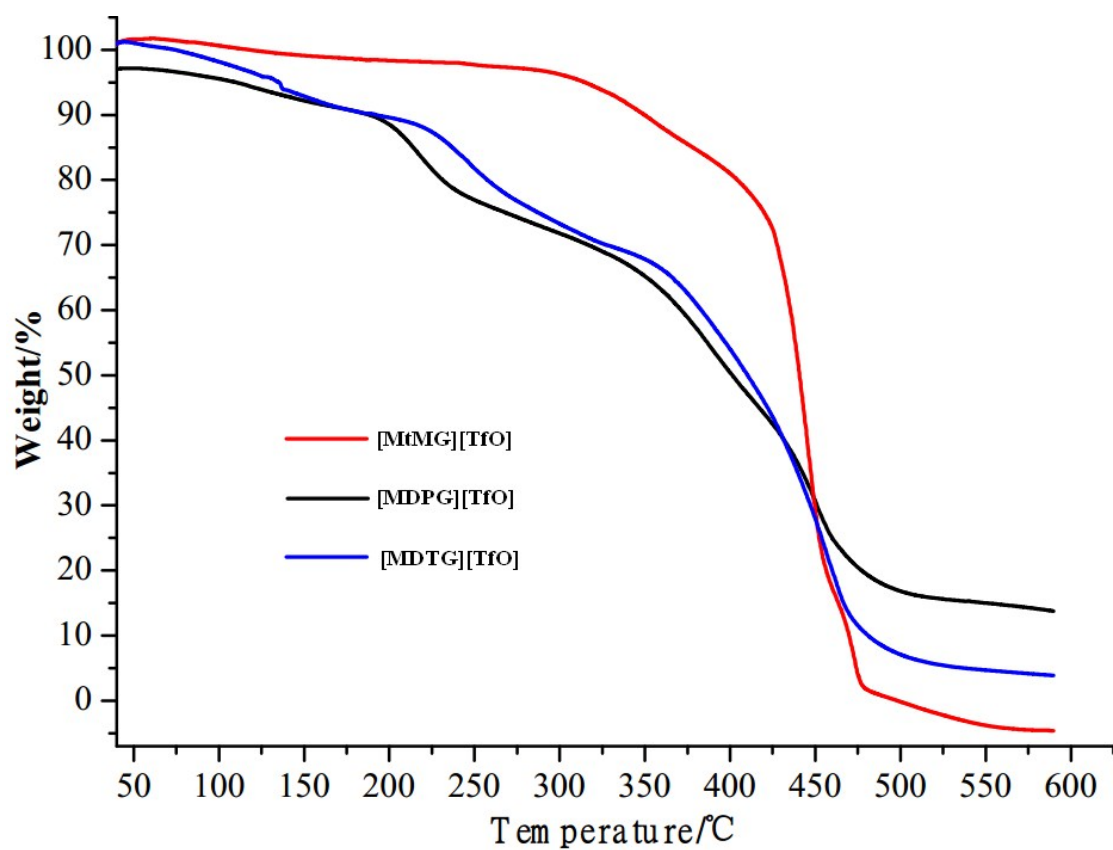

**Fig. S7** TG curves of [MtMG][TfO], [MDPG][TfO] and [MDTG][TfO].

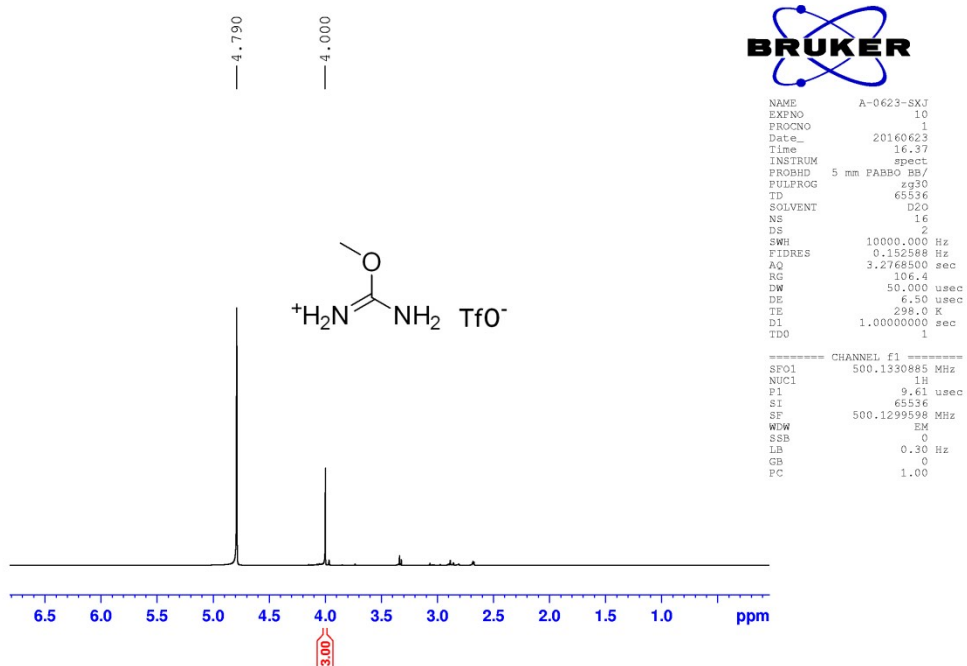

**Fig. S8**  $^1\text{H}$  NMR spectrum of ionic liquid [MU][TfO].

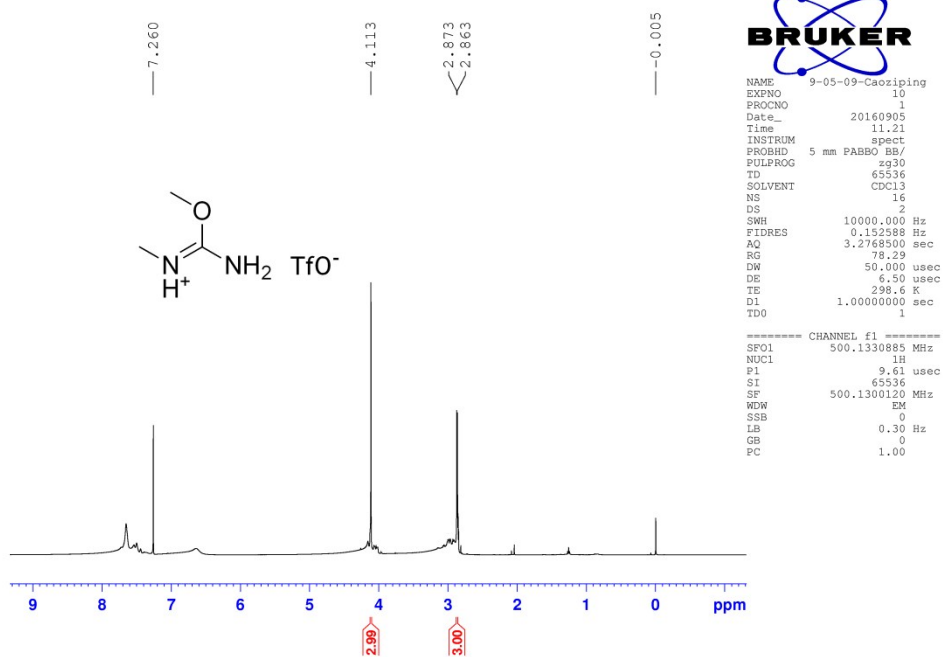

**Fig. S9**  $^1\text{H}$  NMR spectrum of ionic liquid [MMU][TfO].

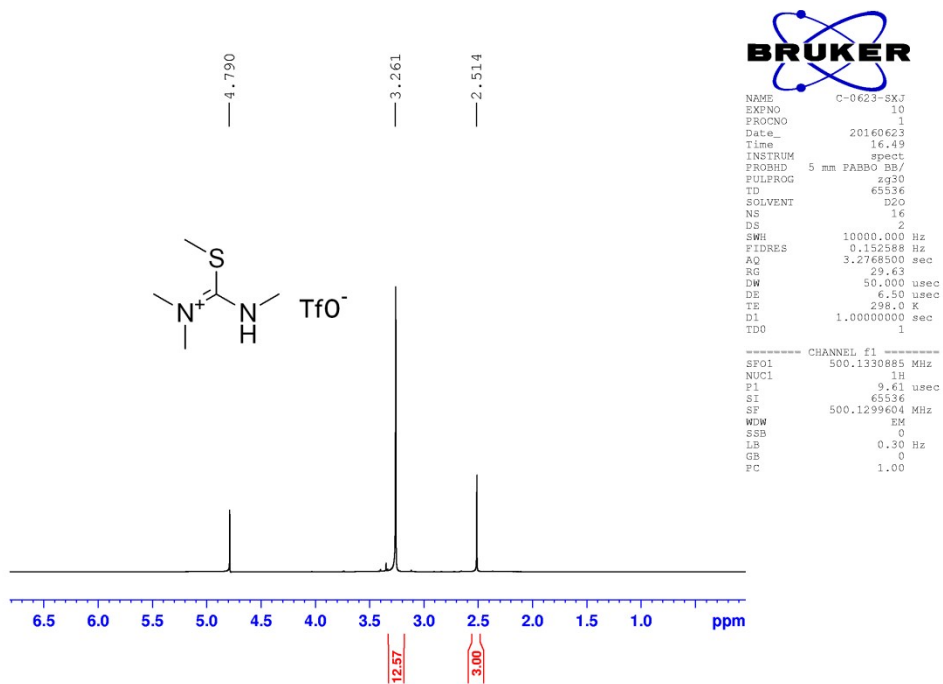

**Fig. S10**  $^1\text{H}$  NMR spectrum of ionic liquid [MtriMSU][TfO].

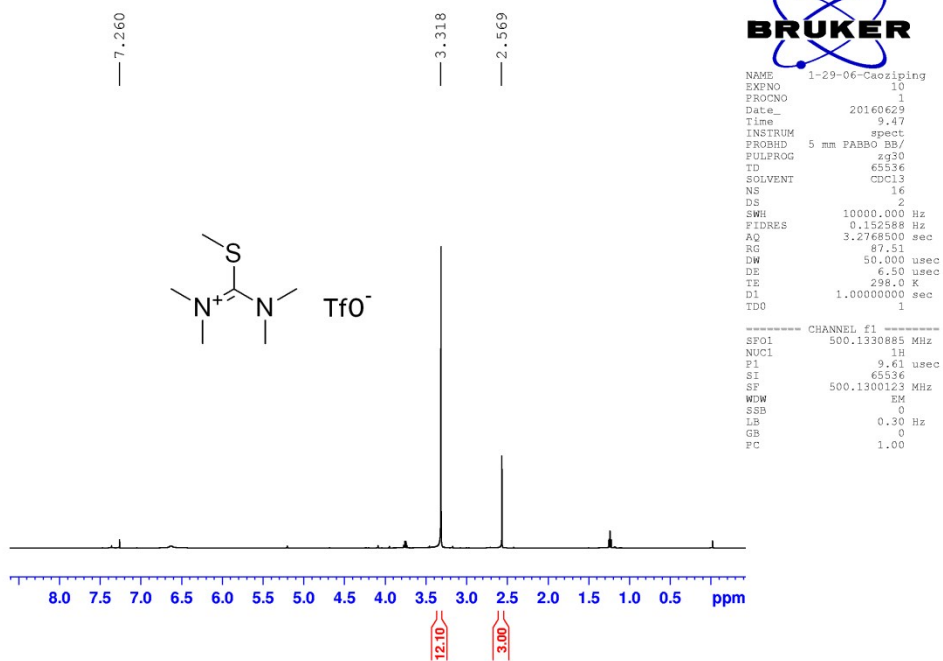

**Fig. S11** <sup>1</sup>H NMR spectrum of ionic liquid [MtMSU][TfO].

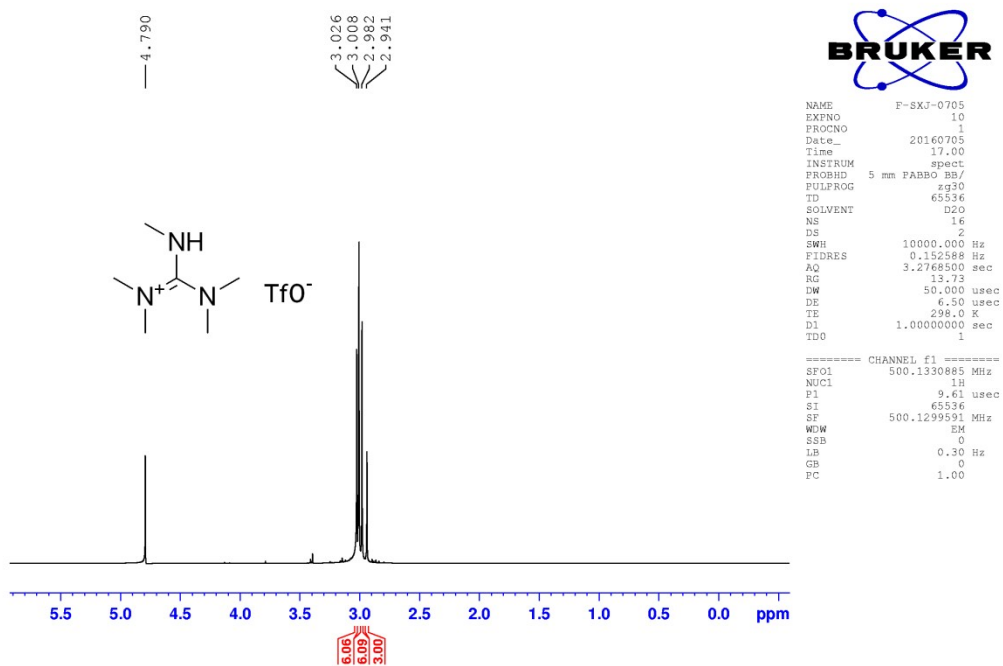

**Fig. S12**  $^1\text{H}$  NMR spectrum of ionic liquid [MtMG][TfO].

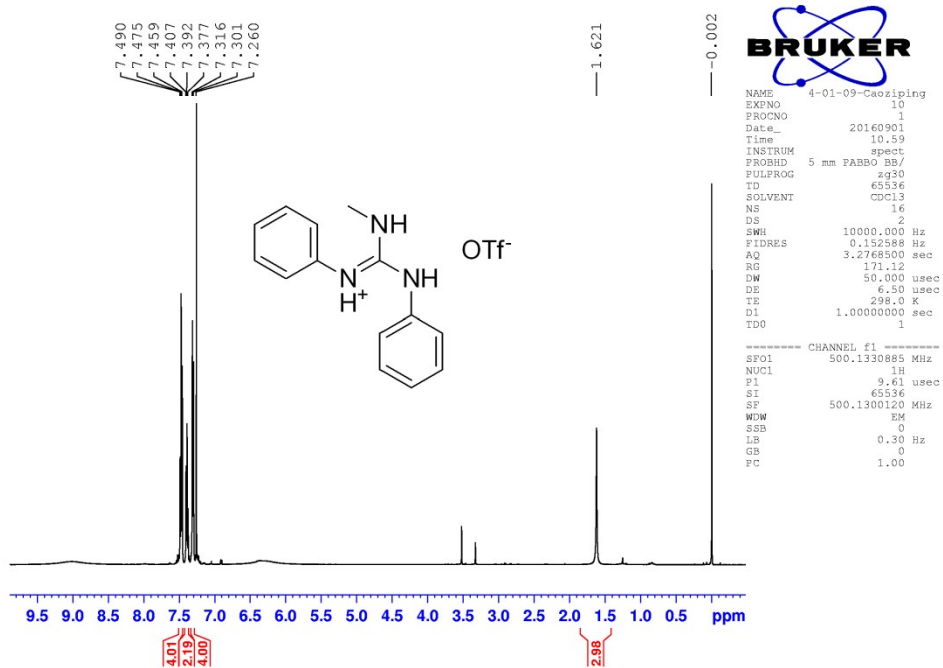

**Fig. S13**  $^1\text{H}$  NMR spectrum of ionic liquid [MDPG][TfO].

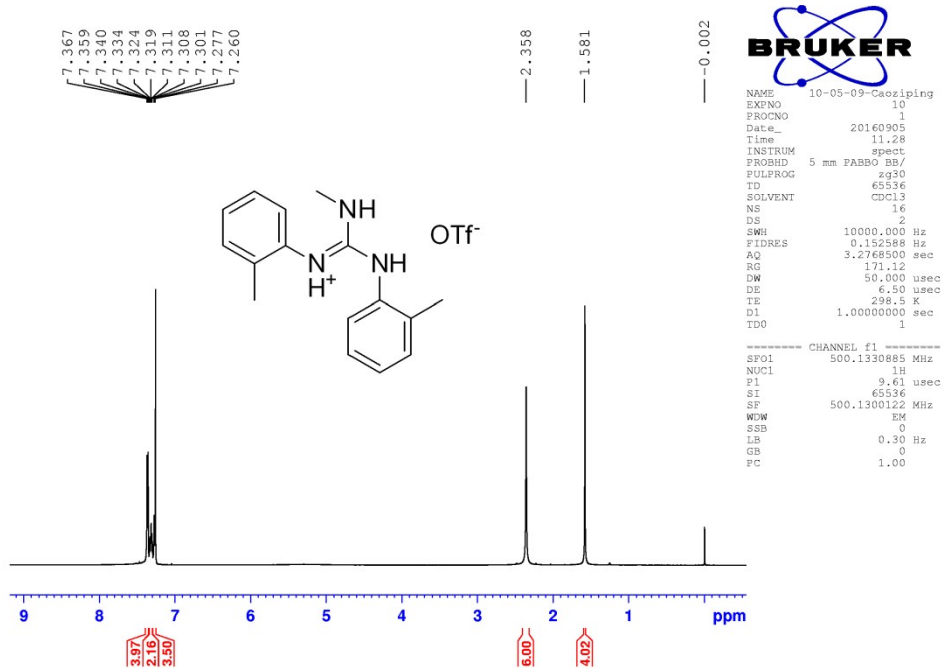

**Fig. S14**  $^1\text{H}$  NMR spectrum of ionic liquid [MDTG][TfO].



Cartesian coordinates and imaginary frequencies for all the transition states.

**[MtMG][TfO]**

Imaginary frequency: -526.48

|   |             |             |             |
|---|-------------|-------------|-------------|
| C | -2.38368600 | -0.06089600 | 0.41639400  |
| N | -3.30943000 | -0.70975400 | -0.38053700 |
| N | -1.56222200 | -0.76082100 | 1.14807300  |
| H | -0.99628700 | -0.20056600 | 1.77661100  |
| C | -3.61505200 | -2.11089100 | -0.13386000 |
| H | -4.66718500 | -2.29616400 | -0.38137000 |
| H | -3.00046600 | -2.78723800 | -0.74612200 |
| H | -3.44499000 | -2.33884000 | 0.91874400  |
| C | -3.64943400 | -0.22937100 | -1.71470300 |
| H | -3.28134500 | -0.93172500 | -2.47658400 |
| H | -4.73612300 | -0.13578900 | -1.83901100 |
| H | -3.18706300 | 0.74147800  | -1.89230800 |
| C | 0.01076200  | -2.18345400 | 0.22637400  |
| H | -0.73381300 | -2.78741600 | 0.71836600  |
| H | -0.23636900 | -1.79373200 | -0.75142000 |
| H | 1.04351500  | -2.45765100 | 0.39270200  |
| N | -2.42548400 | 1.32234300  | 0.37912600  |
| C | -1.28878300 | 2.08418100  | 0.88843600  |
| H | -1.33662600 | 2.22249100  | 1.97969700  |
| H | -0.35256100 | 1.58726900  | 0.63283600  |
| H | -1.30019600 | 3.07461700  | 0.42225600  |
| C | -3.70041700 | 2.03643000  | 0.43134100  |
| H | -3.72784800 | 2.83847600  | -0.31616900 |
| H | -4.52660000 | 1.35037200  | 0.24682400  |
| H | -3.84181100 | 2.48886700  | 1.42360200  |
| C | 2.43779800  | 0.50227700  | -0.97950600 |
| S | 2.47515100  | -0.32616200 | 0.68795900  |
| F | 3.67126300  | 0.66441900  | -1.46163700 |
| F | 1.73254500  | -0.24702700 | -1.85078500 |
| F | 1.84668000  | 1.70612300  | -0.89743100 |
| O | 3.17982400  | 0.60517700  | 1.56679400  |
| O | 3.05344100  | -1.65398000 | 0.42628400  |
| O | 0.97695700  | -0.40863700 | 0.99932100  |

**[MDPG][TfO]**

Imaginary frequency: -541.32

|   |             |             |             |
|---|-------------|-------------|-------------|
| C | -1.75039000 | -1.15138400 | -0.02653400 |
| N | -1.41718200 | -2.47668500 | -0.25821400 |
| N | -1.02592900 | -0.25135700 | 0.55280000  |
| H | -0.12559100 | -0.58623400 | 0.88183200  |
| N | -3.01853300 | -0.85916300 | -0.50644900 |
| C | 3.44311700  | 2.22051400  | 0.54128300  |
| S | 2.47364100  | 1.22725100  | -0.70132500 |
| F | 4.55075100  | 2.70801200  | -0.02577100 |
| F | 2.69883600  | 3.24448700  | 0.98674700  |
| F | 3.78938000  | 1.45895400  | 1.58510500  |
| O | 3.31988000  | 0.07413400  | -1.02374500 |
| O | 2.13740400  | 2.17778500  | -1.77579700 |
| O | 1.24065700  | 0.83316700  | 0.11431200  |
| C | -0.15205700 | -3.09161600 | -0.05642900 |
| C | 1.04350000  | -2.45691300 | -0.41262800 |
| C | -0.12315700 | -4.39217500 | 0.46459900  |
| C | 2.25803700  | -3.11468200 | -0.21878800 |
| H | 1.04657600  | -1.45845800 | -0.83015000 |
| C | 1.09420900  | -5.04983700 | 0.62969400  |
| C | 2.29072800  | -4.41124600 | 0.29659700  |
| H | 3.17133500  | -2.59163700 | -0.48441100 |
| H | 1.10451800  | -6.05990800 | 1.03010700  |
| H | 3.23928300  | -4.92144000 | 0.43660600  |
| C | -3.88410700 | 0.19999000  | -0.14745100 |
| C | -4.91018500 | 0.53175700  | -1.04455200 |
| C | -3.79288000 | 0.87870200  | 1.07715000  |
| C | -5.83236400 | 1.52608000  | -0.72452800 |
| C | -4.71759000 | 1.87731800  | 1.37957100  |
| H | -3.00030700 | 0.63161300  | 1.77168000  |
| C | -5.74063000 | 2.20874700  | 0.48877400  |
| H | -6.62057000 | 1.76802400  | -1.43205400 |
| H | -4.63651100 | 2.39703800  | 2.33051500  |
| H | -6.45474600 | 2.98826700  | 0.73659900  |
| C | -0.61395000 | 1.79874600  | -0.41261200 |
| H | 0.11527100  | 2.20932700  | -1.09898800 |
| H | -0.71111300 | 2.25816400  | 0.56024000  |
| H | -1.52188400 | 1.42035600  | -0.85600900 |
| H | -2.20419900 | -3.11357100 | -0.23638000 |
| H | -3.32056200 | -1.41929300 | -1.29205200 |
| H | -1.05238900 | -4.88434600 | 0.74503500  |
| H | -4.98378500 | 0.00875800  | -1.99608600 |

**[MDTG][TfO]**

Imaginary frequency: -545.73

|   |             |             |             |
|---|-------------|-------------|-------------|
| C | -0.15600800 | -1.38464900 | 0.17486900  |
| N | 0.94722900  | -1.63802000 | -0.60333400 |
| N | -0.19129200 | -1.36153200 | 1.47398300  |
| H | 0.72623700  | -1.55236800 | 1.87471500  |
| N | -1.28911700 | -1.16054600 | -0.59628800 |
| C | 1.15090400  | 3.48415900  | -0.17270200 |
| S | -0.14290600 | 2.14250900  | -0.11190600 |
| F | 0.86480600  | 4.34317000  | -1.15488600 |
| F | 1.17820300  | 4.14654600  | 0.98957200  |
| F | 2.35920100  | 2.95317700  | -0.39556800 |
| O | -0.04412500 | 1.46881900  | -1.42087700 |
| O | -1.41441600 | 2.81307200  | 0.20714900  |
| O | 0.36828400  | 1.28586500  | 1.04253200  |
| C | 2.30215100  | -1.73983700 | -0.19066800 |
| C | 2.86343600  | -0.77988100 | 0.66134200  |
| C | 3.07810500  | -2.80796400 | -0.68747900 |
| C | 4.19769100  | -0.89375800 | 1.04959000  |
| H | 2.26111900  | 0.06584900  | 0.97602800  |
| C | 4.41842900  | -2.88246900 | -0.29510200 |
| C | 4.97949200  | -1.94526500 | 0.57268600  |
| H | 4.62765300  | -0.14472300 | 1.70871700  |
| H | 5.02796200  | -3.69988200 | -0.67291700 |
| H | 6.02144800  | -2.03397600 | 0.86690400  |
| C | -2.63313600 | -1.32966000 | -0.18554700 |
| C | -3.64418000 | -0.59479900 | -0.84659700 |
| C | -2.97951400 | -2.27328900 | 0.79497000  |
| C | -4.97399500 | -0.82584000 | -0.47683800 |
| C | -4.31295900 | -2.47000800 | 1.14586200  |
| H | -2.19861000 | -2.83910500 | 1.28741000  |
| C | -5.32113700 | -1.74447500 | 0.51205000  |
| H | -5.75316500 | -0.26044300 | -0.98245500 |
| H | -4.55867300 | -3.20122900 | 1.91146700  |
| H | -6.36339800 | -1.89350100 | 0.77916900  |
| C | -1.11676400 | 0.57116500  | 2.46363200  |
| H | -1.40605100 | 1.57787900  | 2.19966500  |
| H | -0.37711100 | 0.44739700  | 3.24231200  |
| H | -1.86529800 | -0.19764600 | 2.36022100  |
| H | 0.73773600  | -1.91250500 | -1.55390000 |
| C | 2.48603500  | -3.84028900 | -1.61745000 |
| H | 1.57096200  | -4.28246200 | -1.20479800 |
| H | 2.22639700  | -3.41567900 | -2.59817000 |

|   |             |             |             |
|---|-------------|-------------|-------------|
| H | 3.19781900  | -4.65013300 | -1.80033100 |
| H | -1.12537600 | -0.47902600 | -1.33282800 |
| C | -3.32174300 | 0.41375200  | -1.92432100 |
| H | -2.72874400 | 1.25107000  | -1.54087500 |
| H | -2.75754900 | -0.03234800 | -2.75550000 |
| H | -4.24327700 | 0.82393500  | -2.34714100 |

**[MDMSF][TfO]**

Imaginary frequency: -459.10

|   |             |             |             |
|---|-------------|-------------|-------------|
| C | 2.28017500  | 0.00517100  | 0.01207700  |
| H | 1.28225100  | -0.30858500 | 0.30707800  |
| N | 3.17668200  | -0.96967800 | 0.02140200  |
| C | 2.76984100  | -2.33335500 | 0.37772700  |
| H | 2.96098900  | -3.00750200 | -0.46484900 |
| H | 3.34864800  | -2.67722000 | 1.24207000  |
| H | 1.70586100  | -2.34522000 | 0.61967900  |
| C | 4.57526000  | -0.78837200 | -0.35473500 |
| H | 4.79449800  | 0.27583200  | -0.44208100 |
| H | 5.21666500  | -1.23709100 | 0.41073400  |
| H | 4.77242100  | -1.28061100 | -1.31423900 |
| C | 0.12648100  | 2.86859100  | 0.22697300  |
| H | 0.98181500  | 3.26959400  | 0.74936800  |
| H | -0.02520800 | 3.17310500  | -0.79893300 |
| H | -0.74006300 | 2.63432000  | 0.82936200  |
| S | -1.30778300 | 0.04343500  | 0.56667500  |
| O | -0.49781600 | 0.86634500  | -0.42637000 |
| O | -1.89432400 | 0.85927500  | 1.64247700  |
| C | -2.74226600 | -0.52306700 | -0.48111900 |
| F | -2.30418900 | -1.25188000 | -1.51432600 |
| F | -3.41263600 | 0.53469500  | -0.95302400 |
| F | -3.57182600 | -1.26943600 | 0.25489100  |
| O | -0.60957400 | -1.19948800 | 0.95293600  |
| S | 2.49653200  | 1.61830500  | -0.40503500 |

**[MMSU][TfO]**

Imaginary frequency: -484.19

|   |             |             |             |
|---|-------------|-------------|-------------|
| C | 2.39521800  | 0.36682400  | -0.55109300 |
| N | 2.04492100  | 1.61816500  | -0.23350800 |
| C | 2.03635800  | 2.14943200  | 1.12450200  |
| H | 2.99762900  | 1.96049200  | 1.60249400  |
| H | 1.86833300  | 3.22700400  | 1.06228700  |
| H | 1.24018300  | 1.68166900  | 1.71391100  |
| C | 0.91158200  | -2.37379900 | 1.04213200  |
| H | 0.73059700  | -2.10344000 | 2.07260800  |
| H | 0.06925800  | -2.60924100 | 0.40579300  |
| H | 1.86556700  | -2.80849800 | 0.79016900  |
| S | -0.98127700 | -0.28911800 | -0.50713800 |
| O | -0.01267300 | -0.39752500 | 0.66103500  |
| O | -1.28444000 | -1.59291600 | -1.11935200 |
| C | -2.55160900 | 0.26628400  | 0.32774000  |
| F | -2.35896300 | 1.44175900  | 0.93748500  |
| F | -2.92259400 | -0.63831200 | 1.24144500  |
| F | -3.52572600 | 0.39808800  | -0.57522400 |
| O | -0.64555500 | 0.82657000  | -1.42252200 |
| H | 1.39760500  | 2.06256700  | -0.87776100 |
| N | 2.12371900  | -0.04154700 | -1.81312100 |
| H | 1.29936600  | 0.34448000  | -2.26968500 |
| H | 2.32144100  | -1.01178000 | -2.01311200 |
| S | 3.17422300  | -0.69431100 | 0.55672400  |

**[MtriMSU][TfO]**

Imaginary frequency: -475.80

|   |             |             |             |
|---|-------------|-------------|-------------|
| C | 2.20322200  | -0.33520200 | 0.09929600  |
| N | 1.87766000  | -1.62669600 | -0.12813400 |
| C | 1.51989300  | -2.12244800 | -1.45540300 |
| H | 0.42807500  | -2.19248400 | -1.53728800 |
| H | 1.29114400  | -0.27985800 | 1.87984100  |
| C | 2.48864300  | 1.42666700  | 1.82421400  |
| H | 1.79283000  | 2.20136100  | 1.47960200  |
| H | 2.49603800  | 1.42187700  | 2.91731800  |
| H | 3.48731900  | 1.66149500  | 1.45539500  |
| S | -1.25762900 | 0.60170600  | 0.45104400  |
| O | -0.81625600 | -0.17028600 | 1.63340600  |
| O | -1.76068700 | 1.96447300  | 0.67940900  |
| O | -0.26974000 | 0.52073100  | -0.70413300 |
| C | -2.68957200 | -0.38742300 | -0.21478600 |
| C | 0.56091400  | 2.39181200  | -1.49454600 |
| H | 1.48193800  | 2.90357000  | -1.26303700 |
| H | 0.44589000  | 1.98536900  | -2.48916800 |
| H | -0.32444100 | 2.69606900  | -0.95422200 |
| F | -3.16627400 | 0.17719800  | -1.32944700 |
| F | -2.28447200 | -1.63478200 | -0.50512600 |
| F | -3.66669000 | -0.45246400 | 0.69241500  |
| H | 1.89439800  | -1.44060000 | -2.21473700 |
| H | 1.96181000  | -3.11327500 | -1.60059800 |
| N | 2.09267700  | 0.09712100  | 1.37771900  |
| S | 2.77548300  | 0.71260100  | -1.14925000 |
| C | 1.50623300  | -2.51455500 | 0.97586600  |
| H | 2.16645900  | -2.34060800 | 1.82921500  |
| H | 0.46450700  | -2.35974800 | 1.28273100  |
| H | 1.63041500  | -3.54708700 | 0.64125500  |

**[MtMSU][TfO]**

Imaginary frequency: -481.16

|   |             |             |             |
|---|-------------|-------------|-------------|
| C | -2.24166700 | 0.14654900  | -0.04945400 |
| N | -2.25868800 | 0.26404200  | 1.30503800  |
| C | -2.47678000 | 1.55903600  | 1.94234600  |
| H | -1.53432700 | 2.11365600  | 2.03511300  |
| C | -1.95616100 | -1.42336100 | -1.93809400 |
| H | -1.52810100 | -2.43008400 | -1.92099600 |
| H | -2.80671600 | -1.40011400 | -2.63055000 |
| H | -1.19301800 | -0.72607300 | -2.27629400 |
| S | 1.33694100  | -0.34383400 | -0.36777600 |
| O | 0.86874100  | -1.67480800 | 0.05195300  |
| O | 1.50970100  | -0.09822000 | -1.80937100 |
| O | 0.58893100  | 0.77857200  | 0.34495400  |
| C | 3.04655700  | -0.17504600 | 0.35203600  |
| C | 0.39910200  | 2.60926600  | -0.85917900 |
| H | -0.37677400 | 3.35918400  | -0.85167400 |
| H | 1.20560900  | 2.74374900  | -0.15479400 |
| H | 0.62366000  | 2.09022800  | -1.78127200 |
| F | 3.50137000  | 1.07341900  | 0.13999700  |
| F | 3.02721200  | -0.39868500 | 1.67170600  |
| F | 3.88735700  | -1.04005500 | -0.22097500 |
| H | -3.18388000 | 2.15284500  | 1.36438300  |
| H | -2.88299900 | 1.38047000  | 2.94353800  |
| N | -2.38336500 | -1.09146700 | -0.57753300 |
| S | -2.09861100 | 1.51905400  | -1.07874000 |
| C | -1.55327000 | -0.69943700 | 2.16310400  |
| H | -1.02116600 | -1.42992300 | 1.55711100  |
| H | -0.80050500 | -0.15149100 | 2.73920600  |
| H | -2.24169600 | -1.19653100 | 2.85689200  |
| C | -3.08791700 | -2.17134300 | 0.11106600  |
| H | -2.39864300 | -2.94402700 | 0.47048900  |
| H | -3.65688700 | -1.77148000 | 0.95054100  |
| H | -3.78508600 | -2.63239400 | -0.59778300 |



**[MSU][TfO]**

Imaginary frequency: -449.45

|   |             |             |             |
|---|-------------|-------------|-------------|
| C | 3.22167300  | -0.57296800 | -0.15077900 |
| N | 2.20906600  | -1.39825900 | 0.09234600  |
| C | 0.74571600  | 2.26477300  | 0.58918300  |
| H | 0.50200400  | 2.63628100  | -0.39651700 |
| H | -0.06511000 | 2.02342900  | 1.26335900  |
| H | 1.67409900  | 2.58834200  | 1.03581700  |
| S | -1.22786600 | -0.26304300 | 0.68918600  |
| O | 0.01906100  | 0.26805500  | -0.03526400 |
| O | -1.64441200 | 0.62651600  | 1.78451900  |
| C | -2.53937300 | -0.07545400 | -0.62020700 |
| F | -2.23828900 | -0.81593800 | -1.69225500 |
| F | -2.62643000 | 1.20936900  | -0.99434400 |
| F | -3.72194200 | -0.46795200 | -0.13909700 |
| O | -1.11760400 | -1.70394100 | 0.94142200  |
| H | 2.35155900  | -2.35787100 | 0.37864900  |
| N | 4.48100600  | -1.07380300 | -0.14375400 |
| H | 4.64408600  | -2.06960400 | -0.21856400 |
| H | 5.23540100  | -0.46147200 | -0.41666500 |
| S | 2.99183200  | 1.10067600  | -0.46314200 |
| H | 1.25950500  | -1.00924500 | 0.09374900  |

**[MDMF][TfO]**

Imaginary frequency: -476.87

|   |             |             |             |
|---|-------------|-------------|-------------|
| C | 2.33461500  | 0.16999800  | 0.02951100  |
| H | 1.44153400  | -0.33897200 | 0.39877700  |
| O | 2.31149000  | 1.37475800  | -0.29509000 |
| N | 3.42707300  | -0.60176400 | -0.04737000 |
| C | 3.36675500  | -2.00720700 | 0.33834100  |
| H | 3.62936300  | -2.64629000 | -0.51296300 |
| H | 4.06835000  | -2.20819200 | 1.15658300  |
| H | 2.35448300  | -2.25260800 | 0.66696900  |
| C | 4.69777900  | -0.08301000 | -0.53614100 |
| H | 4.57502300  | 0.97242200  | -0.77774400 |
| H | 5.47241900  | -0.19704800 | 0.23119800  |
| H | 5.01001400  | -0.63068200 | -1.43303200 |
| C | 0.55518000  | 2.68402200  | -0.01714100 |
| H | 1.45474400  | 3.07682400  | 0.43151800  |
| H | 0.39951200  | 2.88196700  | -1.06776300 |
| H | -0.31450600 | 2.59191800  | 0.62099700  |
| S | -1.16324700 | 0.09847000  | 0.53378800  |
| O | -0.32892000 | 0.75383900  | -0.56014800 |
| O | -1.67430400 | 1.07524900  | 1.51213200  |
| C | -2.64964600 | -0.48274300 | -0.42997300 |
| F | -2.27936200 | -1.34738800 | -1.38130400 |
| F | -3.26045600 | 0.55858300  | -1.00767700 |
| F | -3.51022300 | -1.08748900 | 0.39483200  |
| O | -0.53904300 | -1.13037500 | 1.05763000  |

**[MMA][TfO]**

Imaginary frequency: -474.22

|   |             |             |             |
|---|-------------|-------------|-------------|
| C | 2.76404700  | -0.13462000 | -0.01397000 |
| O | 2.31846900  | -0.17203100 | 1.15590600  |
| N | 2.93474300  | 1.04808900  | -0.62253500 |
| C | 2.39334500  | 2.28459900  | -0.06580700 |
| H | 2.77815400  | 2.44003500  | 0.94439400  |
| H | 2.70142700  | 3.11676800  | -0.70124100 |
| H | 1.30060200  | 2.23294300  | -0.02678700 |
| C | 0.71092200  | -1.50603000 | 1.76923300  |
| H | 0.22483800  | -0.65508700 | 2.22296400  |
| H | 0.08301100  | -2.21547200 | 1.25049500  |
| H | 1.62036700  | -1.86356000 | 2.22700000  |
| S | -1.29375000 | -0.77517900 | -0.54695300 |
| O | 0.19822000  | -0.66971100 | -0.25351400 |
| O | -1.92605200 | -1.84998200 | 0.23671800  |
| C | -1.92194400 | 0.80047000  | 0.22368400  |
| F | -1.31080000 | 1.86924900  | -0.31646700 |
| F | -1.66679800 | 0.80494100  | 1.54888200  |
| F | -3.23775100 | 0.92805400  | 0.04749600  |
| O | -1.60060000 | -0.65389100 | -1.97204700 |
| H | 3.25609500  | 1.05047400  | -1.58020600 |
| C | 3.14422000  | -1.37833900 | -0.77980000 |
| H | 2.21939600  | -1.87478100 | -1.08829500 |
| H | 3.74331100  | -1.16482700 | -1.66980800 |
| H | 3.70389700  | -2.05201400 | -0.12524200 |

**[Mlplb][TfO]**

Imaginary frequency: -455.50

|   |             |             |             |
|---|-------------|-------------|-------------|
| C | 2.30176700  | -0.25317100 | 0.06312500  |
| O | 1.99797600  | -0.41116000 | 1.27066500  |
| N | 2.22336300  | 0.92613800  | -0.56951300 |
| C | 1.72484400  | 2.18397800  | 0.00115900  |
| H | 1.22132000  | 1.90821700  | 0.92898500  |
| H | 2.45921800  | 0.93740200  | -1.55391800 |
| C | 2.89969000  | 3.11649000  | 0.32792600  |
| H | 2.53444800  | 4.03989500  | 0.79098200  |
| H | 3.59901600  | 2.63638500  | 1.01990900  |
| H | 3.44936300  | 3.39154300  | -0.58066400 |
| C | 0.71146000  | 2.82174000  | -0.95303700 |
| H | 1.17413200  | 3.05348900  | -1.92179700 |
| H | -0.13975000 | 2.15742500  | -1.11692500 |
| H | 0.34292500  | 3.76419600  | -0.53390200 |
| C | 2.87898500  | -1.42321800 | -0.72947600 |
| H | 3.08805400  | -1.08281800 | -1.75341800 |
| C | 1.86716500  | -2.57959200 | -0.79030000 |
| H | 0.92911100  | -2.27602400 | -1.26243000 |
| H | 2.29332100  | -3.41196900 | -1.36107100 |
| H | 1.63971200  | -2.93622200 | 0.21897900  |
| C | 4.20501000  | -1.86544300 | -0.08308800 |
| H | 4.63047300  | -2.70809100 | -0.63817200 |
| H | 4.94289800  | -1.05481600 | -0.07605400 |
| H | 4.03463400  | -2.18174600 | 0.95046200  |
| S | -1.74434600 | -0.97307600 | -0.11142200 |
| O | -1.80544300 | -1.54094700 | -1.46005700 |
| O | -2.17440700 | -1.79907000 | 1.03047800  |
| O | -0.42684800 | -0.25856000 | 0.16164400  |
| C | -2.93149900 | 0.46187800  | -0.12229800 |
| C | 0.07746800  | -0.25676300 | 2.33670900  |
| H | 0.93525300  | -0.11322300 | 2.97382000  |
| H | -0.59809800 | 0.57702500  | 2.21285300  |
| H | -0.34571900 | -1.24726600 | 2.24303500  |
| F | -2.85590500 | 1.12013000  | 1.05400000  |
| F | -2.62124700 | 1.32758300  | -1.10067500 |
| F | -4.18772300 | 0.04954900  | -0.29748900 |

**[MDMP][TfO]**

Imaginary frequency: -458.26

|   |             |             |             |
|---|-------------|-------------|-------------|
| C | -1.84704800 | 0.78731700  | -0.19275200 |
| O | -1.47129700 | 0.96594600  | 0.98925800  |
| N | -2.30673200 | -0.41500000 | -0.57596400 |
| C | -2.34664000 | -1.60199600 | 0.29417000  |
| H | -1.53818800 | -1.45883800 | 1.01431300  |
| H | -2.65994800 | -0.51069700 | -1.51938800 |
| C | -3.68099500 | -1.68169500 | 1.04590600  |
| H | -3.68201800 | -2.54038200 | 1.72642700  |
| H | -3.84310000 | -0.77551400 | 1.63751900  |
| H | -4.52128900 | -1.79943000 | 0.35066500  |
| C | -2.05961700 | -2.84759300 | -0.54640700 |
| H | -2.82269200 | -2.99120200 | -1.32341500 |
| H | -1.07905000 | -2.77380500 | -1.02388400 |
| H | -2.06763300 | -3.73865300 | 0.08938100  |
| C | -1.85810700 | 1.89606600  | -1.22720000 |
| H | -0.81306100 | 2.17359700  | -1.39288000 |
| C | -2.67394200 | 3.11059900  | -0.75988500 |
| H | -2.29547400 | 3.49468300  | 0.19192500  |
| H | -2.61360800 | 3.91369800  | -1.50090700 |
| H | -3.73077200 | 2.85616800  | -0.62154800 |
| S | 2.27470900  | 0.58247000  | -0.07987100 |
| O | 3.09421500  | 0.75641000  | -1.27847400 |
| O | 2.89480500  | 0.77135400  | 1.24430100  |
| O | 0.92648600  | 1.28971000  | -0.17700100 |
| C | 1.76807600  | -1.20961900 | -0.11039900 |
| C | 0.23135900  | 2.19624800  | 1.71748400  |
| H | -0.60598800 | 2.14850700  | 2.39482700  |
| H | 1.14749400  | 1.69084800  | 2.00175700  |
| H | 0.32348800  | 3.07990100  | 1.10141300  |
| F | 0.97969100  | -1.49744400 | 0.94309900  |
| F | 1.07604200  | -1.48290900 | -1.23179700 |
| F | 2.83865600  | -2.00507100 | -0.06523000 |
| H | -2.24807300 | 1.52208300  | -2.18133700 |

**[MDMA][TfO]**

Imaginary frequency: -446.15

|   |             |             |             |
|---|-------------|-------------|-------------|
| C | -2.21332900 | 1.23580000  | 0.03046400  |
| O | -1.68967000 | 1.11376700  | 1.16087600  |
| N | -3.03961700 | 0.28704000  | -0.44067900 |
| C | -3.24773100 | -1.01917600 | 0.20729100  |
| H | -3.06566900 | -0.84630900 | 1.27078300  |
| H | -3.41223400 | 0.40814300  | -1.37389800 |
| C | -4.69937400 | -1.45914300 | 0.00321700  |
| H | -4.87805000 | -2.41326200 | 0.50916000  |
| H | -5.40049900 | -0.72005100 | 0.40481500  |
| H | -4.92372200 | -1.60601900 | -1.06163200 |
| C | -2.23562700 | -2.04699600 | -0.31475600 |
| H | -2.38226300 | -2.23165700 | -1.38615300 |
| H | -1.21043000 | -1.69877500 | -0.16412100 |
| H | -2.36134700 | -3.00038200 | 0.21094700  |
| C | -1.97652900 | 2.44171500  | -0.84692100 |
| H | -2.67667600 | 2.50144200  | -1.68512400 |
| S | 1.93658000  | 0.52047200  | -0.58907600 |
| O | 2.11636700  | 0.25033700  | -2.01528000 |
| O | 2.82817700  | 1.48820700  | 0.07519700  |
| O | 0.47606200  | 0.75210000  | -0.21057300 |
| C | 2.27513000  | -1.09754200 | 0.26797900  |
| C | 0.28427200  | 1.86643300  | 1.70924900  |
| H | -0.45646200 | 2.52353400  | 2.13810100  |
| H | 0.47602700  | 0.93593000  | 2.22329400  |
| H | 1.10632600  | 2.30960800  | 1.16442400  |
| F | 2.07926500  | -0.96542300 | 1.59608700  |
| F | 1.44589200  | -2.05235500 | -0.18081900 |
| F | 3.53360500  | -1.49202700 | 0.06446900  |
| H | -2.06430200 | 3.35093300  | -0.24531400 |
| H | -0.95587600 | 2.37642800  | -1.23385900 |

**[MMU][TfO]**

Imaginary frequency: -503.74

|   |             |             |             |
|---|-------------|-------------|-------------|
| C | -2.56014900 | 0.08801600  | -0.40510500 |
| N | -2.66895100 | -1.24917500 | -0.23812800 |
| C | -2.72103500 | -1.84325900 | 1.08952400  |
| H | -3.35615100 | -1.22499500 | 1.72404000  |
| H | -3.15354600 | -2.84397100 | 1.01361700  |
| H | -1.72072500 | -1.90246100 | 1.53433200  |
| C | -1.04757600 | 2.02811200  | 1.44205800  |
| H | -0.62272100 | 1.59095600  | 2.33379800  |
| H | -0.36554600 | 2.41305200  | 0.69252800  |
| H | -2.03412000 | 2.45464100  | 1.51105400  |
| S | 0.74664300  | 0.18659500  | -0.44007700 |
| O | -0.13091400 | 0.11950300  | 0.80400800  |
| O | 0.91168600  | 1.56827300  | -0.93168400 |
| C | 2.41195900  | -0.31289700 | 0.22715100  |
| F | 2.35409000  | -1.54162200 | 0.75034800  |
| F | 2.79235500  | 0.54585200  | 1.18239200  |
| F | 3.31707900  | -0.29833200 | -0.75408300 |
| O | 0.41274800  | -0.85230400 | -1.43291600 |
| H | -2.31799400 | -1.83275700 | -0.98674400 |
| N | -2.25931900 | 0.52640400  | -1.67025600 |
| H | -1.59794100 | -0.03360900 | -2.20082200 |
| H | -2.05198800 | 1.51595900  | -1.71160600 |
| O | -2.80584200 | 0.89254400  | 0.53059700  |

**[MU][TfO]**

Imaginary frequency: -506.01

|   |             |             |             |
|---|-------------|-------------|-------------|
| C | 2.72381400  | -0.36363000 | -0.14223400 |
| N | 2.64165600  | -1.28554300 | -1.14008500 |
| C | 1.36428100  | 2.37380900  | -0.06126100 |
| H | 0.80348600  | 2.66801400  | -0.93631000 |
| H | 0.81115500  | 2.17118000  | 0.84893000  |
| H | 2.38858100  | 2.69866700  | 0.01413600  |
| S | -0.50689300 | -0.17601900 | 0.34846100  |
| O | 0.25186500  | 0.57853800  | -0.73434800 |
| O | -0.45129400 | 0.51288800  | 1.65313400  |
| C | -2.27176500 | -0.02567600 | -0.22737100 |
| F | -2.42313900 | -0.61449400 | -1.41733100 |
| F | -2.60260800 | 1.26751300  | -0.33932800 |
| F | -3.08709400 | -0.60739000 | 0.65526800  |
| O | -0.22951300 | -1.62570600 | 0.33688500  |
| H | 2.09992900  | -2.12378000 | -0.96388200 |
| N | 2.57886800  | -0.82013900 | 1.13420100  |
| H | 1.96057300  | -1.60961800 | 1.28781500  |
| H | 2.49230200  | -0.09388100 | 1.83242000  |
| O | 3.00978100  | 0.83424500  | -0.38951100 |
| H | 2.48146800  | -0.87191600 | -2.04885200 |
